# Supplementary material for: Organic aerosol source apportionment by offline-AMS over a full year in Marseille
Source: Copernicus journal article supplement (doi:10.5194/acp-2017-54), 2017-02-01
Supplement: Supplementary file 1 [file acp-2017-54-supplement.pdf]

1 **Supplement of: Organic aerosol source apportionment by offline-AMS over a full year**  
 2 **in Marseille**

3 C. Bozzetti et al.

4 Correspondence to: A. S. H. Prévôt ([andre.prevot@psi.ch](mailto:andre.prevot@psi.ch))

5 N. Marchand ([nicolas.marchand@univ-amu.fr](mailto:nicolas.marchand@univ-amu.fr))

6

7 Table S1. Supporting measurements. Batch 1 denotes the set of filters collected during the  
 8 yearly cycle from August 2011 to July 2012. Batch 2 indicated the set of filters collected  
 9 during February 2011.

| Analytical Method                                                                                                     | Measured compounds / variable                                                                                                                                                                                                    | Batch of filters |
|-----------------------------------------------------------------------------------------------------------------------|----------------------------------------------------------------------------------------------------------------------------------------------------------------------------------------------------------------------------------|------------------|
| Tapered element oscillating microbalance equipped with a Filter Dynamic Measurement System                            | PM <sub>2.5</sub>                                                                                                                                                                                                                | 1                |
| IC (Jaffrezo et al., 1998)                                                                                            | SO <sub>4</sub> <sup>2-</sup> , NO <sub>3</sub> <sup>-</sup> , Cl <sup>-</sup> , NH <sub>4</sub> <sup>+</sup> , Na <sup>+</sup> , K <sup>+</sup> , Ca <sup>2+</sup> , Mg <sup>2+</sup> , oxalate, malate, malonate and succinate | 1,2              |
| Thermal Optical Transmittance using Sunset Lab Analyzer (Birch and Cary, 1996)                                        | CO <sub>3</sub> <sup>2-</sup>                                                                                                                                                                                                    | 1                |
| Thermal Optical Transmittance using Sunset Lab Analyzer (EUSAAR2, Cavalli et al., 2010)                               | EC/OC                                                                                                                                                                                                                            | 1,2              |
| Water extraction Thermal Decomposition ND-IR determination using TOC analyzer (description in Bozzetti et al., 2016a) | WSOC                                                                                                                                                                                                                             | 1                |

|                                                                                                                                                                                        |                                                                                                                                                                                                                                                                                                                                                                                                                                    |     |
|----------------------------------------------------------------------------------------------------------------------------------------------------------------------------------------|------------------------------------------------------------------------------------------------------------------------------------------------------------------------------------------------------------------------------------------------------------------------------------------------------------------------------------------------------------------------------------------------------------------------------------|-----|
| Water extraction Thermal<br>Decomposition<br>Chemiluminescence using TOC<br>analyzer<br><br>(Chemical Derivatization) GC-<br>MS<br><br>(El Haddad et al., 2009; Favez et<br>al., 2010) | Total nitrogen (TN)                                                                                                                                                                                                                                                                                                                                                                                                                | 1   |
| (Chemical Derivatization) GC-<br>MS<br><br>(El Haddad et al., 2009; Favez et<br>al., 2010)                                                                                             | <b>PAH:</b> phenantrene, anthracene,<br>fluoranthene, acephenantrene, pyrene,<br>benzo[a]anthracene,<br>chrysene/Triphenylene,<br>benzo[b,k]fluoranthene,<br>benzo[j]fluoranthene, benzo-e-pyrene,<br>benzo-a-pyrene, indeno[1,2,3 - cd]pyrene,<br>dibenzo[a,h]anthracene, benzo - ghi -<br>perylene                                                                                                                               |     |
| (Chemical Derivatization) GC-<br>MS<br><br>(El Haddad et al., 2009; Favez et<br>al., 2010)                                                                                             | <b>Alkanes:</b> octadecane (C18), nonadecane<br>(C19), eicosane (C20), heneicosane (C21),<br>docosane (C22), tricosane (C23),<br>tetracosane (C24), pentacosane (C25),<br>hexacosane (C26), heptacosane (C27),<br>octacosane (C28), nonacosane (C29),<br>triacontane (C30), untricontane (C31),<br>dotriacontane (C32), tritriacontane (C33),<br>tetracontane (C34), pentatriacontane<br>(C35), hexatriacontane (C36)              | 1,2 |
| (Chemical Derivatization) GC-<br>MS<br><br>(El Haddad et al., 2009; Favez et<br>al., 2010)                                                                                             | <b>Hopanes:</b> 17 $\alpha$ (H) - 21 $\beta$ (H) - norhopane<br>(C29), 17 $\alpha$ (H) - 21 $\beta$ (H) - hopane (C30),<br>17 $\alpha$ (H) - 21 $\beta$ (H)-22R- homohopane<br>(C31), 17 $\alpha$ (H)-21 $\beta$ (H)-22S-homohopane<br>(C31), 17 $\alpha$ (H)-21 $\beta$ (H)-22S-<br>bishomohopane (C32), 17 $\alpha$ (H)-21 $\beta$ (H)-<br>22R-bishomohopane (C32), 17 $\alpha$ (H)-<br>21 $\beta$ (H)-22S-trishomohopane (C33), |     |

---

|                                                                                 |                                                                                                                                                                                                                                                                                                                                                                                                                                                                                                                                                                |                          |                 |     |
|---------------------------------------------------------------------------------|----------------------------------------------------------------------------------------------------------------------------------------------------------------------------------------------------------------------------------------------------------------------------------------------------------------------------------------------------------------------------------------------------------------------------------------------------------------------------------------------------------------------------------------------------------------|--------------------------|-----------------|-----|
|                                                                                 | 17 $\alpha$ (H)-21 $\beta$ (H)-22R-trishomohopane<br>(C33)                                                                                                                                                                                                                                                                                                                                                                                                                                                                                                     |                          |                 |     |
| (Chemical Derivatization) GC-MS<br>(El Haddad et al., 2009; Favez et al., 2010) | <p><b><u>Cellulose and lignin pyrolysis products:</u></b><br/>levoglucosan, vanilline, coniferaldehyde, syringaldehyde, acetosyringone, vanillic Acid, abietic Acid</p> <p><b><u>Sterols:</u></b> cholesterol, stigmasterol, <math>\beta</math> - sitosterol</p> <p><b><u>Fatty acids:</u></b> stearic acid, oleic acid, linoleic Acid, palmitic Acid</p> <p><b><u>Phthalate esters:</u></b> di-ethyl phthalate, di-isobutyl phthalate, dibutyl phthalate, benzyl butyl phthalate, bis (2-ethyl hexyl) phthalate</p> <p><b><u>Others:</u></b> pinonic acid</p> |                          |                 |     |
| (Chemical Derivatization) GC-MS<br>(El Haddad et al., 2009; Favez et al., 2010) |                                                                                                                                                                                                                                                                                                                                                                                                                                                                                                                                                                |                          |                 |     |
| ICP-MS<br>(Chauvel et al., 2010; El Haddad et al., 2011).                       | Al, As, Ba, Ca, Cd, Ce, Co, Cr, Cs, Cu, Fe, K, La, Li, Mg, Mn, Mo, Na, Ni, Pb, Pd, Pt, Rb, Sb, Sc, Se, Sn, Sr, Ti, Tl, V, Zn, Zr                                                                                                                                                                                                                                                                                                                                                                                                                               |                          |                 | 1,2 |
| UPLC-ESI-ToF-MS (Iinuma et al., 2010).                                          | 4-methyl-5-nitrocatechol<br>(major)/3-methyl-5-nitrocatechol<br>(minor)                                                                                                                                                                                                                                                                                                                                                                                                                                                                                        | 3-methyl-4-nitrocatechol | 4-nitrocatechol | 1   |

---

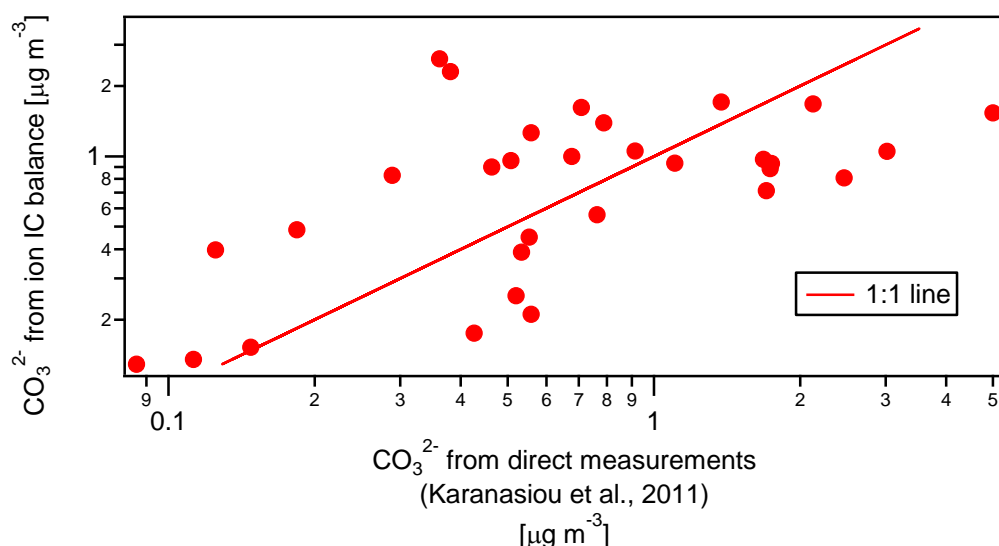

1  
 2 Figure S1. Scatter plot of CO<sub>3</sub><sup>2-</sup> measurements (Karanasiou et al., 2011) vs. CO<sub>3</sub><sup>2-</sup> estimates  
 3 from the IC ion balance. The CO<sub>3</sub><sup>2-</sup> molar concentration from ion balance was estimated as  
 4 the difference between the equivalents of cations (Ca<sup>2+</sup>, K<sup>+</sup>, NH<sub>4</sub><sup>+</sup>, Na<sup>+</sup>, Mg<sup>2+</sup>) and anions  
 5 (NO<sub>3</sub><sup>-</sup>, SO<sub>4</sub><sup>2-</sup>, Cl<sup>-</sup>).

#### 6 HCO<sub>3</sub><sup>-</sup> correction of offline-AMS spectra.

7 As mentioned in the manuscript, the measured pH of the filter extract never exceeded 8,  
 8 indicating the absence of CO<sub>3</sub><sup>2-</sup> in solution, and that we can assume that water-extracted CO<sub>3</sub><sup>2-</sup>  
 9 is present as HCO<sub>3</sub><sup>-</sup>. Considering all the measured HCO<sub>3</sub><sup>-</sup> as deriving from Ca(HCO<sub>3</sub>)<sub>2</sub> or  
 10 from NaHCO<sub>3</sub>, none of the liquid extracts exceeded the Ca(HCO<sub>3</sub>)<sub>2</sub> or NaHCO<sub>3</sub> saturation  
 11 concentrations at 20°C. Even considering all the measured CO<sub>3</sub><sup>2-</sup> to be in the CaCO<sub>3</sub> form  
 12 (however we can exclude this assumption as the pH of the liquid extracts was always < 8),  
 13 only one filter extract showed a CO<sub>3</sub><sup>2-</sup> concentration exceeding the CaCO<sub>3</sub> saturation  
 14 concentration. Therefore we can assume all the estimated CO<sub>3</sub><sup>2-</sup> (from IC ion balance) to be  
 15 solubilized and in the HCO<sub>3</sub><sup>-</sup> form. This would be our best estimate of the HCO<sub>3</sub><sup>-</sup> water-  
 16 soluble concentration. In the following we also assess the sensitivity of the source  
 17 apportionment results on the HCO<sub>3</sub><sup>-</sup> correction of the PMF input matrices (described  
 18 hereafter) by performing a source apportionment without HCO<sub>3</sub><sup>-</sup> corrections.

19 The HCO<sub>3</sub><sup>-</sup> correction was implemented by estimating the HCO<sub>3</sub><sup>-</sup> relative ionization  
 20 efficiency (RIE) with respect to NO<sub>3</sub><sup>-</sup>. We measured nebulized and size-selected NaHCO<sub>3</sub>  
 21 particles (400 nm mobility diameter, using a differential mobility analyzer, DMA) in the

1 AMS. From the particle-ToF signal (pToF, Fig. S2) of the AMS we determined a NaHCO<sub>3</sub>  
 2 Jayne shape factor  $S$  of  $0.9\pm 0.1$  (Jayne et al. 2000, variability from multiple NaHCO<sub>3</sub>  
 3 injections), defined as:

$$4 \quad S = \frac{d_{va}}{d_m} \cdot \frac{\rho_0}{\rho_m} \quad (S1)$$

5 Here  $d_{va}$  denotes the aerodynamic diameter under vacuum measured by the AMS and  $d_m$  the  
 6 DMA mobility diameter (DeCarlo et al., 2004).  $\rho_0$  is the standard density of  $1 \text{ g cm}^{-3}$  and  $\rho_m$   
 7 represents the NaHCO<sub>3</sub> density ( $2.2 \text{ g cm}^{-3}$ ). Perfectly spherical particles are characterized by  
 8 an  $S$  value of 1, in our case we observed  $S$  values not significantly different from 1 (within our  
 9 uncertainties) for standard NaHCO<sub>3</sub> injections, indicating that there is no reason to consider  
 10 non-spherical particles. Note that previous DMA and pToF calibrations were conducted using  
 11 polystyrene (PSL) spherical particles with known diameters.

12

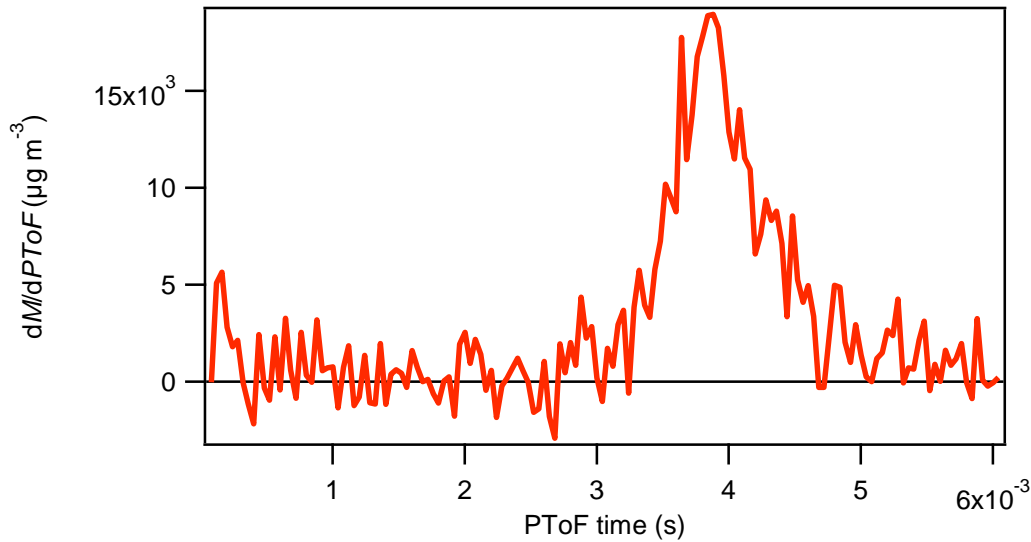

13

14 Figure S2. NaHCO<sub>3</sub> pToF signal.

15 Data from NaHCO<sub>3</sub> nebulization were collected using the single particle (brute force single  
 16 particle (BFSP), Drewnik et al., 2004) AMS operating mode, tracing the HCO<sub>3</sub><sup>-</sup> signal at  $m/z$   
 17 44. By using the NaHCO<sub>3</sub> particle density, and the newly determined Jayne shape factor  
 18 ( $0.9\pm 0.1$ ) we calculated the number of HCO<sub>3</sub><sup>-</sup> ions per particle. The HCO<sub>3</sub><sup>-</sup> ionization  
 19 efficiency ( $IE_{HCO_3^-}$ ) was calculated by dividing the number of CO<sub>2</sub><sup>+</sup> ions detected per particle  
 20 by the number of NaHCO<sub>3</sub> molecules per particle ( $IPP_{HCO_3^-}$ ) and by the  $m/z$  44 fractional  
 21 contribution ( $f_{44}$ ) to the HCO<sub>3</sub><sup>-</sup> spectrum ( $f_{44} = 0.44$ ) in order to account for the contribution

1 of other fragments to the  $\text{HCO}_3^-$  spectrum. The  $\text{HCO}_3^-$  relative IE ( $RIE_{\text{HCO}_3^-}$ ) in comparison  
 2 to  $\text{NO}_3^-$  was determined as follows:

$$3 \quad RIE_{\text{HCO}_3^-} = \frac{IE_{m/z=44, \text{HCO}_3^-}}{IE_{\text{NO}_3^-}} \cdot \frac{\text{ionization cross section}(\text{NO}_3^-)}{\text{ionization cross section}(\text{HCO}_3^-)} \quad (\text{S2})$$

4 Here the molecular weights of  $\text{NO}_3^-$  and  $\text{HCO}_3^-$  were used as proxies for the corresponding  
 5 ionization cross sections.  $RIE_{\text{HCO}_3^-}$  was determined to be  $1.4 \pm 0.2$  (0.2 is the variability from  
 6 multiple  $\text{HCO}_3^-$  nebulizations ( $n=3$ ) which includes the ion per particle counting uncertainty),  
 7 which is not statistically different from the standard  $RIE$  assumed for organics ( $RIE_{org} = 1.4$ ).

8 Water-soluble mass spectra were corrected as described hereafter. Inputs for this correction  
 9 are:

- 10 - measured water-soluble normalized AMS spectra  $(\overline{AMS})_{norm,i}$  and corresponding
- 11 OM:OC ratios  $(\frac{OM}{OC})'_i$ ,
- 12 - WSOC<sub>*i*</sub> measurements (TOC analyzer),
- 13 -  $\text{HCO}_3^-$ <sub>*i*</sub> estimates from IC ion balance,
- 14 -  $\text{HCO}_3^-$  normalized AMS spectrum  $\overline{HCO}_3^-_{norm}$  as measured from  $\text{NaHCO}_3$  solution
- 15 nebulization, and corresponding  $(\frac{HCO_3^-}{C_{HCO_3^-}})$  ratio determined from the  $\text{HCO}_3^-$  AMS
- 16 spectrum, (4.01).

17 No correction for gaseous  $\text{CO}_2$  was applied to the  $\overline{HCO}_3^-_{norm}$  spectrum as the  $\text{CO}_2$  and  $\text{HCO}_3^-$   
 18 fragmentation is supposed to be the same due to the  $\text{HCO}_3^-$  thermal decomposition into  $\text{CO}_2$   
 19 and  $\text{H}_2\text{O}$  onto the vaporizer. Moreover, the fragments deriving from the water fragmentation  
 20 ( $\text{O}^+$ ,  $\text{OH}^+$ , and  $\text{H}_2\text{O}^+$ ) do not introduce differences into the  $\text{CO}_2$  and  $\text{HCO}_3^-$  spectra because  
 21 their intensities were estimated from the  $\text{CO}_2^+$  fragment according to the standard AMS  
 22 fragmentation table (Aiken et al., 2008).

23 For a generic filter sample *i*, the measured  $(\text{OM}/\text{OC})'_i$  ratio represents a linear combination of  
 24  $(\text{OM}/\text{OC})_i$  contributions deriving from  $\text{HCO}_3^-$ <sub>*i*</sub> and from WSOM<sub>*i*</sub>. Considering the statistically  
 25 not different  $RIE$ s of organics and  $\text{HCO}_3^-$ , we can assume the organics and  $\text{HCO}_3^-$  AMS  
 26 response to be not different. In the same way, considering internally mixed particles from  
 27 filter extracts nebulization, we assumed equal CE for both WSOM and  $\text{HCO}_3^-$ .

$$28 \quad (\frac{OM}{OC})'_i = (\frac{WSOM + HCO_3^-}{WSOC + C_{HCO_3^-}})_i \quad (\text{S3})$$

1 where  $C_{HCO_3^-}$  represents the C concentration deriving from  $HCO_3^-$  as measured by the AMS,  
 2 calculated from the  $HCO_3^-$  absolute concentrations (from IC ion balance) divided by the  
 3  $\left(\frac{HCO_3^-}{C_{HCO_3^-}}\right)$  ratio determined from the AMS  $HCO_3^-$  spectrum. Similarly to  $\left(\frac{OM}{OC}\right)'_i$ , also the AMS  
 4 mass spectral fingerprint can be considered as the sum of  $WSOM_i$  and  $HCO_3^-$ , therefore the  
 5 normalized blank-subtracted AMS spectra  $(\overline{AMS})_{norm,i}$  and corresponding errors  $\sigma(\overline{AMS})_{norm,i}$   
 6 were rescaled to the sum of  $WSOM_i$  and  $HCO_3^-$  calculated as the sum of  $WSOC_i$  (from TOC  
 7 analyzer) and  $C_{HCO_3^-,i}$  (ion balance) multiplied by  $\left(\frac{OM}{OC}\right)'_i$

$$8 \quad (\overline{AMS})_i = (WSOC_i + C_{HCO_3^-,i}) \cdot \left(\frac{OM}{OC}\right)'_i \cdot (\overline{AMS})_{norm,i} \quad (S4)$$

9 By dividing numerator and denominator of  $\frac{WSOM}{WSOC+C_{HCO_3^-}}$  by  $WSOC$  and by dividing numerator  
 10 and denominator of  $\frac{HCO_3^-}{WSOC+C_{HCO_3^-}}$  by  $C_{HCO_3^-}$ , we can express Eq. S3 as:

$$11 \quad \left(\frac{OM}{OC}\right)'_i = \frac{\left(\frac{OM}{OC}\right)_{WSOM,i}}{1+\frac{C_{HCO_3^-}}{WSOC}} + \frac{\left(\frac{HCO_3^-}{C_{HCO_3^-}}\right)}{1+\frac{WSOC}{C_{HCO_3^-}}} \quad (S5)$$

12 From Eq. S5 we can derive  $\left(\frac{OM}{OC}\right)_{WSOM,i}$ . The time dependent  $WSOM$  concentration was  
 13 therefore calculated as  $\left(\frac{OM}{OC}\right)_{WSOM} \cdot WSOC$ .

14 For a generic filter sample  $i$ , the  $HCO_3^-$  AMS signature  $(\overline{HCO_3^-})_i$  can be determined as:

$$15 \quad (\overline{HCO_3^-})_i = C_{HCO_3^-,i} \cdot \left(\frac{HCO_3^-}{C_{HCO_3^-}}\right) \cdot \overline{HCO_3^-}_{norm} \quad (S6)$$

16 where  $\overline{HCO_3^-}_{norm}$  represents the normalized  $HCO_3^-$  AMS spectrum derived from standard  
 17 injection. To derive the AMS signal purely generated by  $WSOM$   $(\overline{WSOM})_i$ , we subtracted  
 18  $(\overline{HCO_3^-})_i$  (calculated as in Eq. S6) from  $(\overline{AMS})_i$  (calculated as in Eq. S4).

$$19 \quad (\overline{WSOM})_i = (\overline{AMS})_i - (\overline{HCO_3^-})_i \quad (S7)$$

20 The  $CO_3^-$  concentration uncertainty ( $\sigma_{CO_3^-}$ ) was estimated by propagating the error for all the  
 21 ions (measured by IC) used to estimate the  $CO_3^-$  concentration from the ion balance ( $Ca^{2+}$ ,  
 22  $Mg^{2+}$ ,  $K^+$ ,  $Na^+$ ,  $NH_4^+$ ,  $Cl^-$ ,  $NO_3^-$ ,  $SO_4^{2-}$ ). For a generic ion  $s$ , the errors ( $\sigma_{i,s}$ ) were estimated by  
 23 propagating the detection limits  $(DL)_s$  and the relative repeatability  $(RR)_s$  multiplied by the ion  
 24 concentration according to Eq. (S8) (Rocke and Lorenzato, 1995):

$$\sigma_{i,s} = \sqrt{DL_s^2 + (x_i \cdot RR)_s^2} \quad (S8)$$

We assumed for each ion an uncertainty deriving from IC detection limit. On average this  $\text{CO}_3^{2-}$  uncertainty was 28%. The uncertainty associated to  $(\overline{\text{HCO}_3^-})_i$  was instead estimated as:

$$\sigma(\overline{\text{HCO}_3^-})_i = \sigma_{\text{CO}_3^-} \cdot \frac{AW_C}{FW_{\text{CO}_3^{2-}}} \cdot \left( \frac{\text{HCO}_3^-}{C_{\text{HCO}_3^-}} \right) \cdot \overline{\text{HCO}_3^-}_{\text{norm.}} \quad (S9)$$

where  $AW_C$  is the carbon atomic weight and  $FW_{\text{HCO}_3^-}$  represents the  $\text{CO}_3^{2-}$  molecular weight.

The final  $\text{WSOM}_i$  mass spectral uncertainty  $\sigma(\overline{\text{WSOM}})_i$  error was estimated by summing under quadrature ( $\sigma(\overline{\text{HCO}_3^-})_i$ ) and the error associated to the total AMS signal rescaled for the sum of WSOM and  $\text{HCO}_3^-$ .

$$\sigma(\overline{\text{WSOM}})_i = \sqrt{(\sigma(\overline{\text{HCO}_3^-})_i)^2 + (\sigma(\overline{\text{AMS}})_i)^2} \quad (S10)$$

10

### 11 **Influence of the $\text{HCO}_3^-$ correction on the offline-AMS source apportionment results.**

12 As we have mentioned in the main text, Section 2.4, the offline AMS measurements of the  
 13 WSOC are influenced by the presence of inorganic carbonates. This influence has been  
 14 corrected using the carbonate mass estimated from the ion balance obtained by IC  
 15 measurements. If this correction is not applied, PMF separates an additional factor with a  
 16 highly oxidized fingerprint similar to inorganic carbonate and whose time series strongly  
 17 correlates with that of  $\text{Ca}^{2+}$ . In the following we compare the carbonate mass estimated from  
 18 IC measurements and from PMF, and assess the influence of the correction applied on the  
 19 estimation of the different factors.

20 We performed a source apportionment on the non  $\text{HCO}_3^-$  corrected input matrices. Input  
 21 matrices were scaled to  $\text{WSOM}_i$  concentration calculated as  $\text{WSOC}_i$  multiplied by  $(\frac{OM}{OC})'_i$ . We  
 22 explored a 6-factor solution where the additional separated factor was attributed to inorganic  
 23 dust. For a generic water soluble K factor (WSKOA) and a generic time element  $i$ , the  
 24 corresponding water soluble OC concentrations ( $\text{WSKOC}$ ) $_i$  were multiplied by a factor  $(1/(1-$   
 25  $f_{\text{inorganic dust}}))_i$ , where  $f_{\text{inorganic dust}}$  represents the relative contribution of the water soluble  
 26 inorganic dust factor as obtained from PMF. The application of the  $(1/(1-f_{\text{inorganic dust}}))_i$  factor  
 27 enables rescaling the sum of the water soluble OC concentrations of the five organic factors  
 28 (WSHOC, WSBBOC, WSINDOC, WSCOC, WSOOC) to the measured WSOC



1 concentration, under the assumption of no organic contributions to the inorganic dust factor.  
 2 The accuracy of this assumption is discussed in the following.  
 3 In total 240 PMF runs were performed. PMF solutions were retained according to the  
 4 acceptance criteria 1-6 listed in Section 2.4. We found that primary sources (WSHOC,  
 5 WSCOC, WSBBOC, and WSINDOC) showed statistically not different contributions with  
 6 the offline-AMS source apportionment conducted on  $\text{HCO}_3^-$ -corrected spectra. However, for  
 7 some of the retained PMF solutions, the inorganic dust-related factor tended to strongly mix  
 8 with WSOOC because the two factors were characterized by the highest  $f\text{CO}_2^+$  (in this case  
 9 none of the factors showed a strong correlation with  $\text{HCO}_3^-$  concentrations). In order to retain  
 10 the solutions that best resolved the inorganic dust from the WSOOC factor we introduced two  
 11 further acceptance criteria:

- 12 1) Significantly positive  $R$  between inorganic dust and  $\text{HCO}_3^-$ .
- 13 2) Inorganic dust correlation with  $\text{HCO}_3^-$  ( $R$ ) significantly higher than the correlation  
 14 between WSOOC and  $\text{HCO}_3^-$ .

15 Consequently, half of the solutions retained according to criteria 1-6 were discarded.

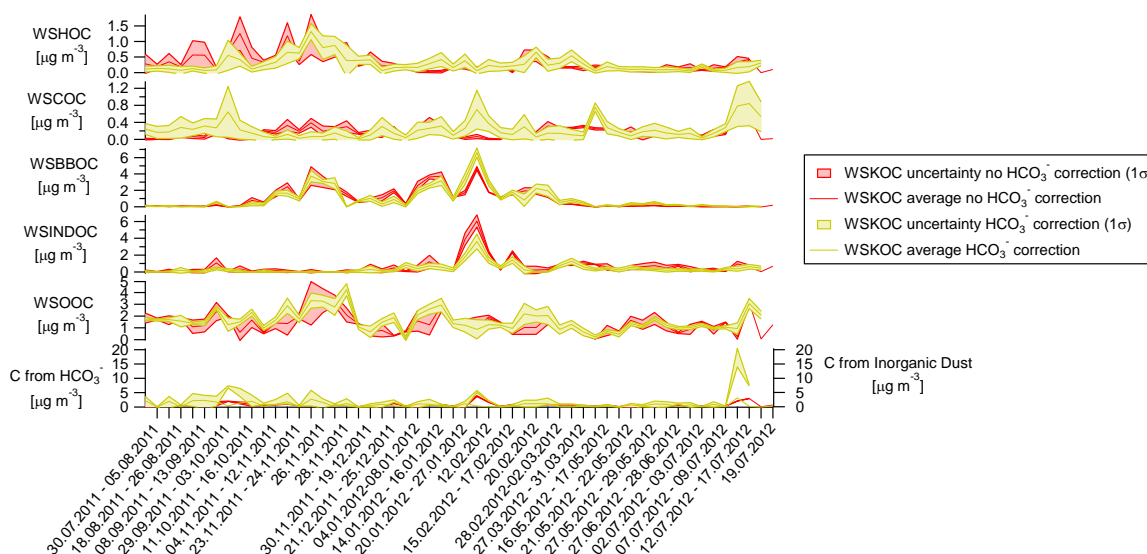

16  
 17 Figure S3. Source apportionment results obtained with and without  $\text{HCO}_3^-$  correction.

18  
 19 WSHOC, WSBBOC, WSOOC, and WSINDOC showed not statistically different  
 20 concentrations (99% confidence interval) with and without the  $\text{HCO}_3^-$  correction. The  
 21 WSCOC factor instead revealed statistically different concentrations within a 99% confidence  
 22 interval, but only for 12% of the data points. Overall the PMF estimate of the C from

1 inorganic dust was higher than the C estimate from  $\text{HCO}_3^-$  derived from the IC ion balance,  
2 and was more uncertain. This can be explained by an imperfect separation from other factors  
3 (especially WSOOC). The difficult separation between WSOOC and inorganic dust hampered  
4 an accurate post-PMF  $\text{HCO}_3^-$  correction. Therefore we opted to show in the manuscript source  
5 apportionment results obtained performing a pre-PMF  $\text{HCO}_3^-$  correction of the OA input  
6 matrices, but we note that this correction while uncertain does not have a significant effect on  
7 factor retrieval.

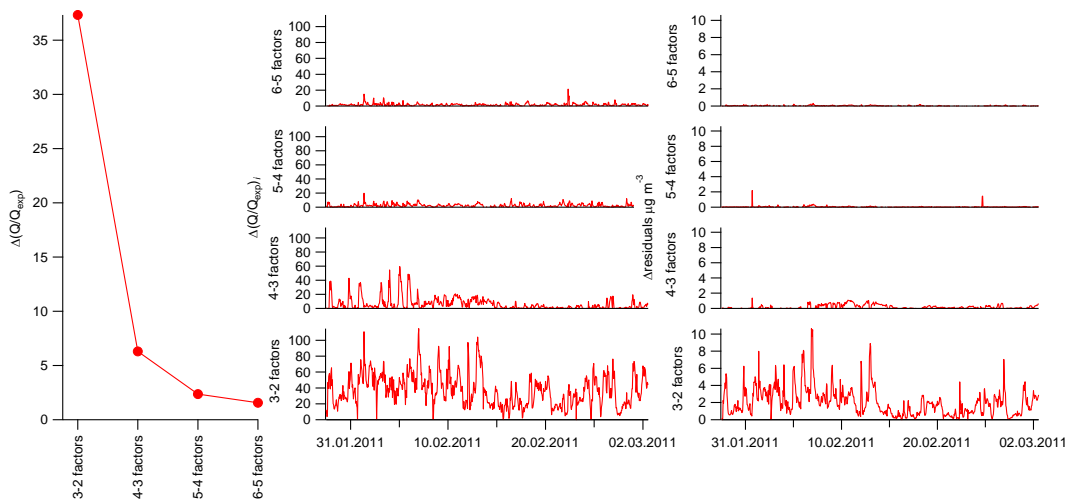

8  
9 Figure S4. Online-AMS PMF  $\Delta Q/Q_{exp}$  analysis. In this study, a large  $Q/Q_{exp}$  decrease could be  
10 observed up to 4 factors. The 4-factor solution enabled resolving BBOA which is mixed with  
11 OOA in the 3-factor solution. Increasing further the number of factors provided only small  
12 additional contributions to the explained variability, resulting in a splitting of HOA in the 5-  
13 factor solution, and BBOA in the 6-factor solution; however the newly separated factors could  
14 not be attributed to specific different sources. In terms of residuals, a clear removal of the  
15 structure can be observed up to 4 factors.

16

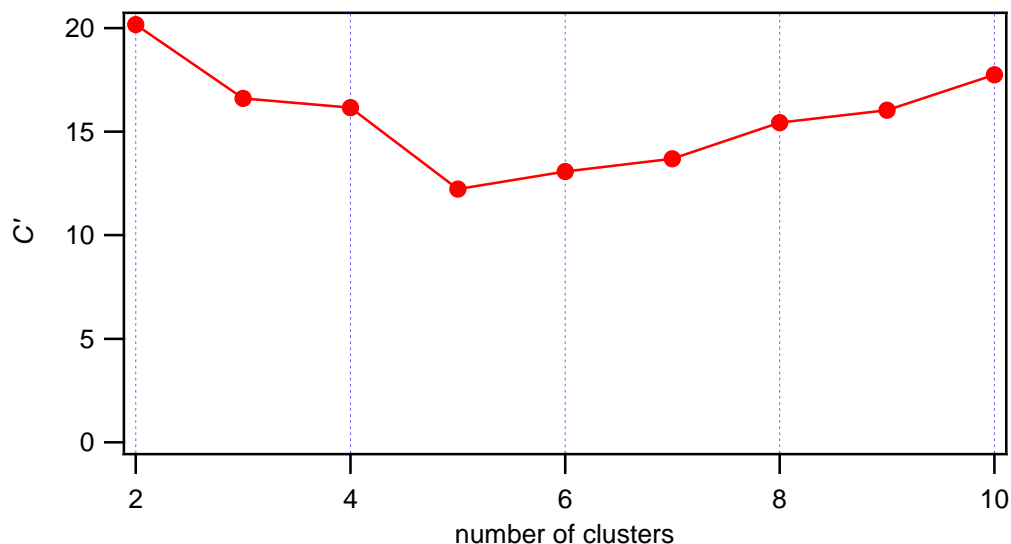

1  
2 Figure S5. Number of cluster selection:  $C$  values (Eq. 7) as a function of the number of  
3 clusters.

4  
5 **Best cluster selection**

6 From the a-value sensitivity analysis, 121 solutions were obtained, the diurnal time series of  
7 which were clustered using a k mean clustering approach. The clusters were then filtered  
8 based on the cosine similarity of the HOA, COA, and BBOA average cluster mass spectra  
9 with the average mass spectra reported in the AMS literature for the same factors (Crippa et  
10 al., 2013b, Mohr et al., 2012 and 2009, Bruns et al., 2015, Docherty et al., 2011, Setyan et al.,  
11 2012, He et al., 2010). Given two vectors (in our case mass spectra)  $A$  and  $B$  with  $n$  elements  
12 each, the cosine similarity is defined as:

13 
$$\text{cosine similarity} = \frac{\sum_{i=1}^n A_i B_i}{\sqrt{\sum_{i=1}^n (A_i)^2} \cdot \sqrt{\sum_{i=1}^n (B_i)^2}} \quad (\text{S11})$$

14 Eq. S11 returns values between -1 and 1, with 1 meaning collinearity, and 0 orthogonality.  
15 Because of the different HR fittings performed in different works, we considered only  
16 fragments in common with our HR fit for comparison. Within the common variables, we  
17 selected a subset of fragments characterized by small variability in comparison to the average  
18 value ( $S/N > 2$ ) for at least one average mass spectrum among COA, HOA, and BBOA. Here  $S$   
19 denotes the average literature value for a certain fragment, and  $N$  represents its standard  
20 deviation. This selection was performed in order to choose the most stable and therefore  
21 certain fragments characterizing the reference spectra. Following this step, 95, 92, and 87% of  
22 the HOA, COA, and BBOA mass was retained for the average reference mass spectra,

1 respectively. For our dataset, depending on the cluster we selected 91-93% of the COA mass,  
2 84-86% for HOA, and 91-93% for BBOA. We explored the deviation of the excluded  
3 fragments from the literature values by checking whether their relative contributions to the  
4 factor mass spectra were within the literature range (maximum and minimum). For this  
5 comparison we calculated the average HOA, COA, BBOA, and OOA spectra for each of the 5  
6 clusters. This average includes all the PMF factor profiles attributed to a specific cluster for  
7 the 100 random initiations of the *k*-mean algorithm. Overall, depending on the cluster, only 1-  
8 2% of the total HOA mass wasn't included within the literature range, 2-5% for COA, while  
9 for BBOA the value was smaller than 0.5%. These diagnostics highlight the relevance in  
10 terms of mass of the fragments retained for the cosine similarity comparison.

11 For each source (BBOA, COA, HOA), individual literature spectra were compared with the  
12 corresponding average literature spectrum in order to estimate the minimum cosine similarity  
13 value characterizing the average profiles. This minimum value is used as a threshold above  
14 which a spectrum can be considered not different from literature profiles within  $1\sigma$ . The  
15 obtained cosine similarities were  $0.965\pm 0.008$  for HOA,  $0.96\pm 0.05$  for COA, and  $0.94\pm 0.06$   
16 for BBOA. Therefore the minimum cosine similarities to define a mass spectrum as not  
17 statistically different from the average reference spectra were 0.957 for HOA, 0.91 for COA,  
18 and 0.88 for BBOA.

19 We note that that reference HOA and COA spectra are less variable ( $0.965\pm 0.008$  and  
20  $0.96\pm 0.05$  respectively) than BBOA ( $0.94\pm 0.06$ ). This is probably due to the different fuels  
21 and burning conditions characterizing the different BBOA ambient and chamber profiles.

22 Subsequently we checked whether the average HOA, COA, and BBOA reference profiles  
23 showed statistically different spectra with each other. This was tested by calculating the  
24 cosine similarity between the average HOA, COA, and BBOA literature profiles and all the  
25 aforementioned profiles reported in literature (Crippa et al., 2013b, Mohr et al., 2012 and  
26 2009, Bruns et al., 2015, Docherty et al., 2011, Setyan et al., 2012, He et al., 2010) for factors  
27 of a different type (e.g. average HOA vs. all COA). Our results indicate that HOA, BBOA,  
28 and COA average literature mass spectra show statistically different profiles within  $1\sigma$  –  
29 average cosine similarities: HOA - BBOA:  $0.5\pm 0.1$ ; HOA - COA:  $0.83\pm 0.05$ , COA - BBOA:  
30  $0.6\pm 0.1$ ; COA – HOA:  $0.83\pm 0.08$ , BBOA - COA:  $0.6\pm 0.1$ ; BBOA - HOA:  $0.5\pm 0.2$ . This  
31 means that PMF factors can be identified based on the analysis approach we have adopted, as  
32 factor mass spectra are characteristic: i.e. differences between mass spectra pertaining to the

1 same factor are significantly smaller than differences between mass spectra related to  
 2 different factors.

3 In order to select the best clusters we determined the cosine similarity of the average cluster  
 4 mass spectra with the average reference profiles. A cluster was retained if the HOA, COA,  
 5 and BBOA average cluster spectra were not statistically different from the corresponding  
 6 average reference profiles. However the average cluster mass spectra are also characterized by  
 7 an uncertainty deriving from the *k*-mean algorithm random initiation. To calculate this  
 8 uncertainty, we generated 100 random cluster profiles by randomly varying the average  
 9 cluster mass spectra within the corresponding standard deviation (calculated as the standard  
 10 deviation of the cluster profiles obtained initiating the *k*-means algorithm 100 times) assuming  
 11 a normal distribution of the error. Each randomly generated profile was compared with the  
 12 average reference spectrum by calculating the corresponding cosine similarity. This provides  
 13 the cosine similarity uncertainty of an average cluster spectrum with the literature average  
 14 reference profile. From the comparison of average cluster mass spectra with reference spectra,  
 15 we observed that HOA and BBOA showed statistically not different fingerprints with the  
 16 corresponding average reference profiles (within  $1\sigma$ ) for all clusters, while COA showed a  
 17 statistically different mass spectrum with respect to the average profile for cluster 5, which  
 18 therefore was not retained for further analysis. For cluster 4, although COA average spectrum  
 19 was statistically not different from the average COA reference profile within  $1\sigma$ , the mass  
 20 spectrum was not statistically different either from the HOA average mass spectrum within  
 21  $1\sigma$ , suggesting a certain mixing of the two sources, therefore also cluster 4 was rejected  
 22 (Table S2).

23 Table S2. Cosine similarity between COA, HOA, and BBOA average cluster spectra with the  
 24 corresponding reference profiles from literature (average of the profiles reported in: Crippa et  
 25 al., 2013b, Mohr et al., 2012 and 2009, Bruns et al., 2015, Docherty et al., 2011, Setyan et al.,  
 26 2012, He et al., 2010). Threshold cosine similarity indicates the minimum cosine similarity  
 27 value which defines a cluster profile as not statistically different from the reference profiles.  
 28 Highlighted values indicate cluster profiles not statistically different from the reference  
 29 profiles.

|     | threshold | 0.957       | 0.91       | 0.89       |
|-----|-----------|-------------|------------|------------|
|     |           | HOA         | COA        | BBOA       |
|     |           | reference   | reference  | reference  |
|     |           | spectrum    | spectrum   | spectrum   |
| HOA | cluster1  | 0.99188 (3) | 0.6931 (1) | 0.4677 (2) |

|      |          |             |             |             |
|------|----------|-------------|-------------|-------------|
|      | cluster2 | 0.99532 (2) | 0.69320 (8) | 0.5237 (1)  |
|      | cluster3 | 0.99177 (6) | 0.6752 (2)  | 0.5254 (3)  |
|      | cluster4 | 0.99025 (9) | 0.6753 (4)  | 0.5448 (5)  |
|      | cluster5 | 0.99674 (4) | 0.7079 (2)  | 0.5195 (4)  |
| COA  | cluster1 | 0.8373 (1)  | 0.99208 (5) | 0.6453 (4)  |
|      | cluster2 | 0.85270 (9) | 0.98997 (2) | 0.62187 (8) |
|      | cluster3 | 0.8861 (2)  | 0.98598 (4) | 0.6045 (2)  |
|      | cluster4 | 0.9565 (8)  | 0.9648 (3)  | 0.6219 (8)  |
|      | cluster5 | 0.80 (1)    | 0.89 (1)    | 0.855 (2)   |
| BBOA | cluster1 | 0.594 (1)   | 0.588 (1)   | 0.9687 (5)  |
|      | cluster2 | 0.7134 (3)  | 0.6874 (1)  | 0.94746 (7) |
|      | cluster3 | 0.6945 (2)  | 0.6739 (2)  | 0.95441 (6) |
|      | cluster4 | 0.578 (1)   | 0.598 (1)   | 0.96752 (5) |
|      | cluster5 | 0.713 (2)   | 0.682 (2)   | 0.943 (1)   |

2

3

4

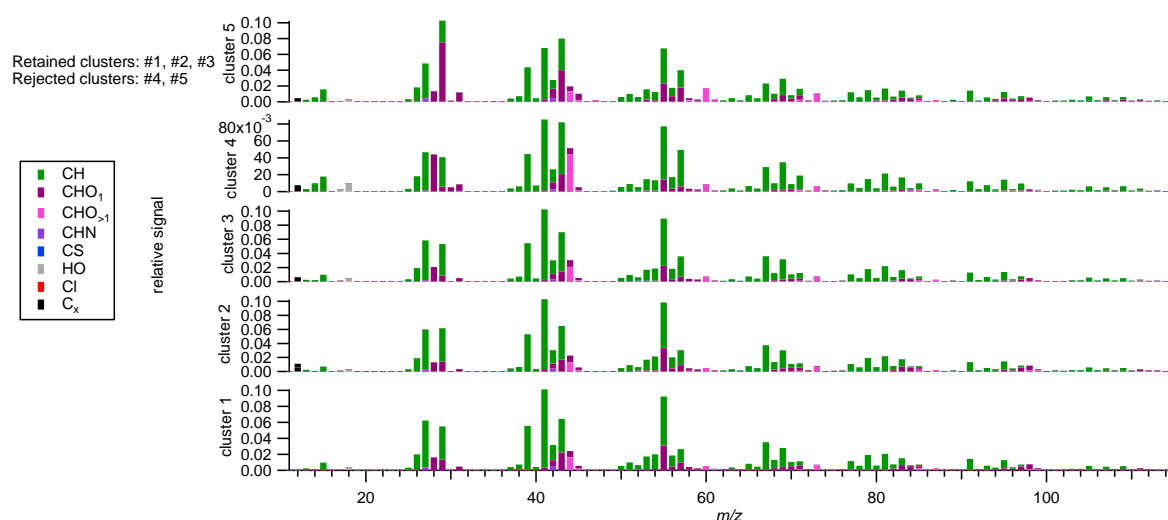

5

6 Figure S6. Average COA cluster spectra.

7 These results are also reflected by the high average COA diurnal pattern correlation with  $\text{NO}_x$   
8 (typical traffic tracer) for cluster 4 ( $R=0.64$ ), while for cluster 5 the average COA diurnal  
9 pattern correlates well with AMS-PAH (highly correlated with BBOA) and fragment  
10  $f\text{C}_2\text{H}_4\text{O}_2^+$  diurnals ( $R = 0.94$  and  $0.98$  respectively), suggesting a certain mixing with BBOA  
11 (Fig. S7). For clusters 1-3, the COA diurnal correlation with  $\text{NO}_x$  and AMS-PAH was smaller  
12 than for clusters 4-5, and smaller than the correlation of HOA with  $\text{NO}_x$  and BBOA with  
13 AMS-PAH indicating a good COA separation from HOA and  $\text{NO}_x$  (Table S2).

1 Table S3. Correlation of COA cluster diurnals with  $\text{NO}_x$ , AMS-PAH,  $m/z$  60, and suboptimal  
 2 clusters. High correlations with  $\text{NO}_x$  suggest possible mixing between COA and HOA; high  
 3 correlations with AMS-PAH and  $m/z$  60 are suggestive of possible mixings between BBOA  
 4 and COA; high correlations with clusters 4 and 5 are probably indicative of uncertain  
 5 attribution of the PMF runs between the optimal and suboptimal clusters.

| COA diurnals |           |           |           |           | Pearson correlation coefficient |
|--------------|-----------|-----------|-----------|-----------|---------------------------------|
| Cluster 1    | Cluster 2 | Cluster 3 | Cluster 4 | Cluster 5 |                                 |
| 0.84         | 0.52      | 0.48      | 0.72      | 0.94      | AMS-PAH                         |
| 0.19         | 0.34      | 0.57      | 0.64      | 0.09      | $\text{NO}_x$                   |
| 0.82         | 0.42      | 0.30      | 0.54      | 0.98      | $m/z$ 60                        |
| 0.77         | 0.83      | 0.93      | 1         | 0.61      | cluster 4 COA diurnal           |
| 0.91         | 0.56      | 0.42      | 0.61      | 1         | cluster 5 COA diurnal           |

6  
 7 Because of the small variability and the relatively high correlation coefficients between HOA  
 8 and  $\text{NO}_x$ , and between BBOA and AMS-PAHs among solutions belonging to the retained  
 9 clusters ( $R$  ranging between 0.76-0.79 and 0.92-0.93 respectively, Fig. S9), we did not select  
 10 additional acceptance criteria based on HOA and BBOA temporal trends.

11

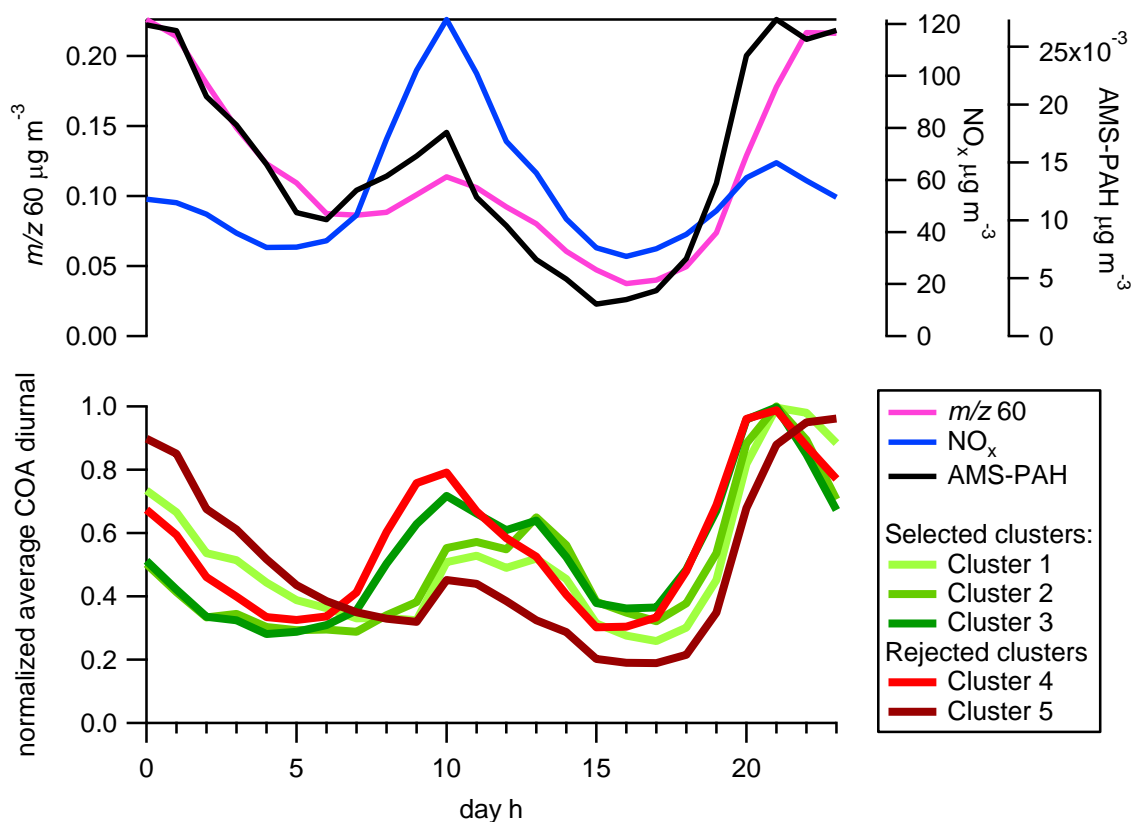

12

1 Figure S7. Average COA diurnal cycles for the different clusters.

2

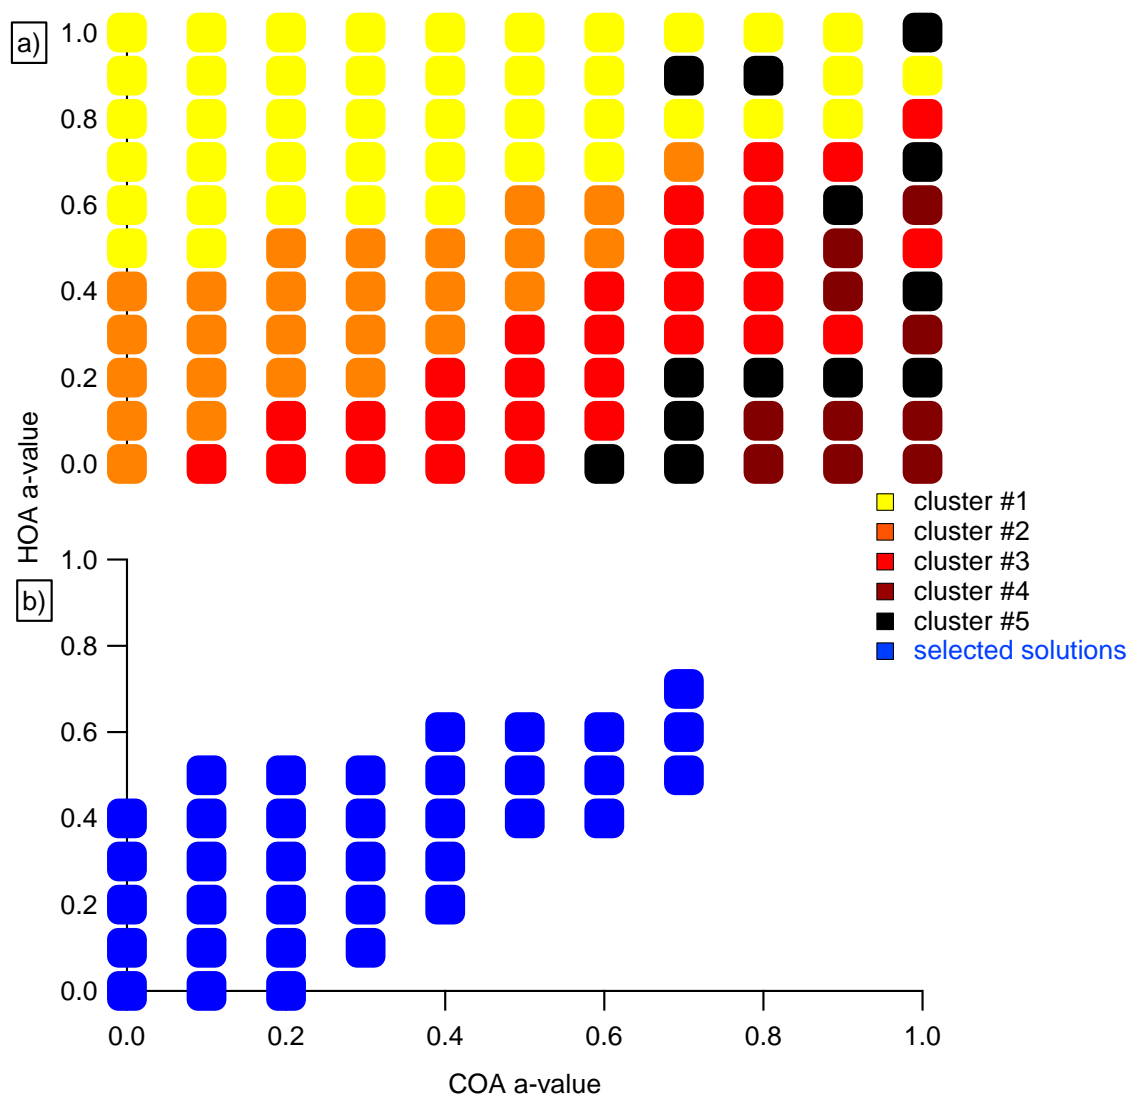

3

4 Figure S8. *a*-value sensitivity analysis: cluster analysis. a) Attribution of the PMF solutions to  
5 the clusters. b) Optimal PMF solutions. We initiated the cluster analysis 100 times; the  
6 selected solutions were those attributed to the optimal clusters (#1-#3) more than 95% of the  
7 cluster analyses. We note that although cluster 1 and 3 were chosen among the optimal  
8 clusters (clusters #1-#3), many of the PMF runs belonging to these clusters were attributed to  
9 suboptimal clusters (#4-#5) more than 5% of the time. Not surprisingly clusters 1 and 3 show  
10 better COA diurnal cycle correlations with the suboptimal clusters than cluster 2 (Table S3).

11

12



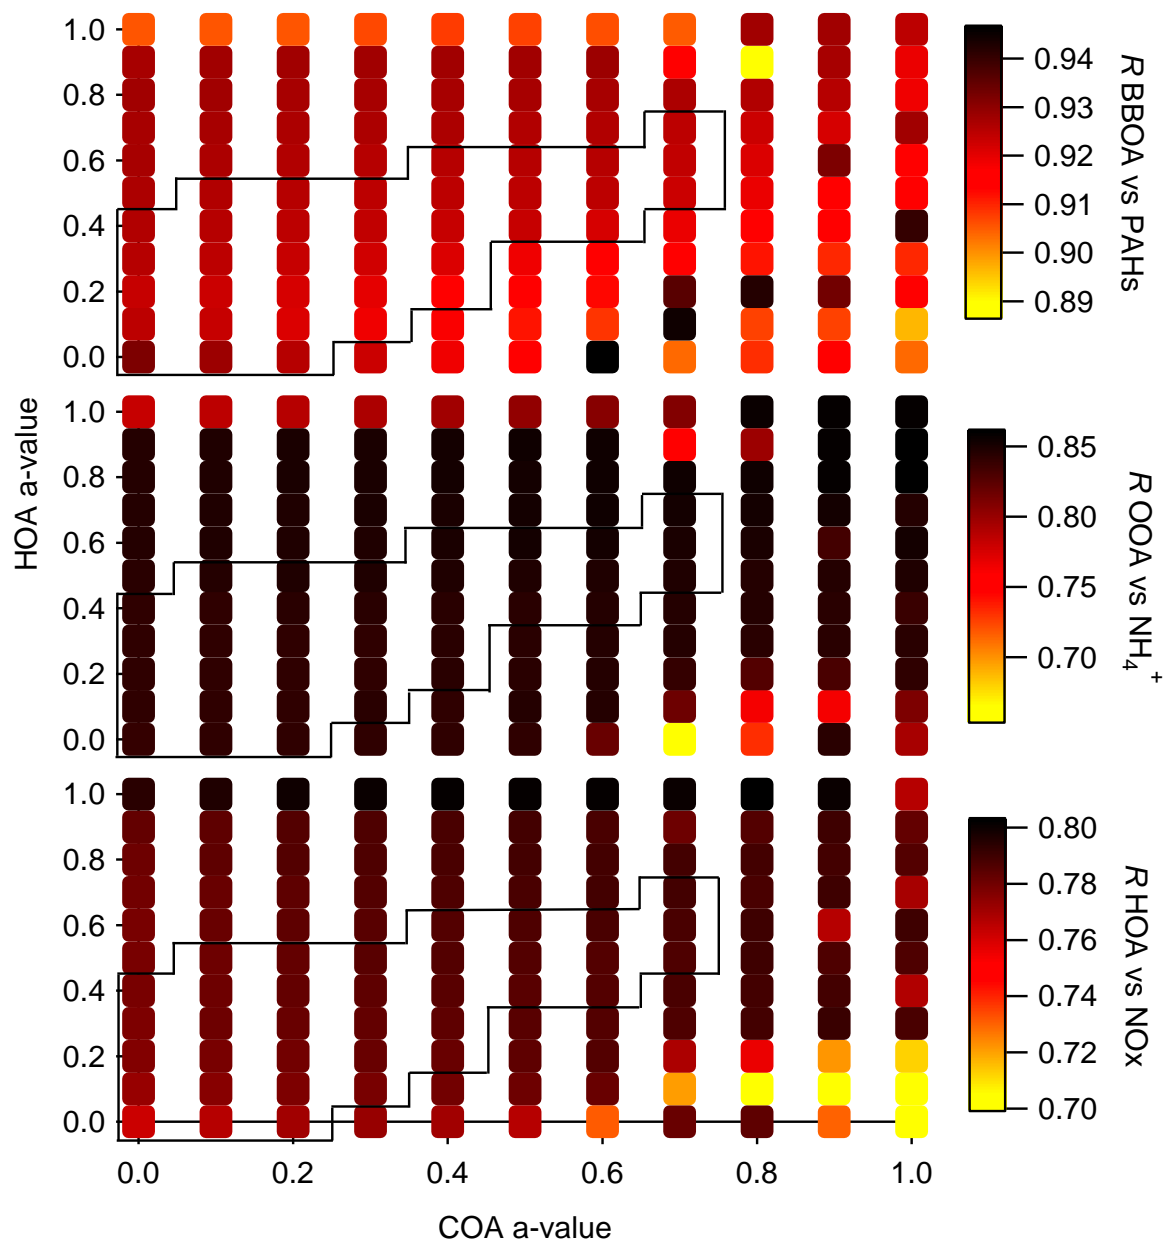

1  
 2 Figure S9.  $a$ -value sensitivity analysis diagnostics: correlations of factor profiles and  
 3 corresponding tracers as a function of COA and HOA  $a$ -values.  
 4

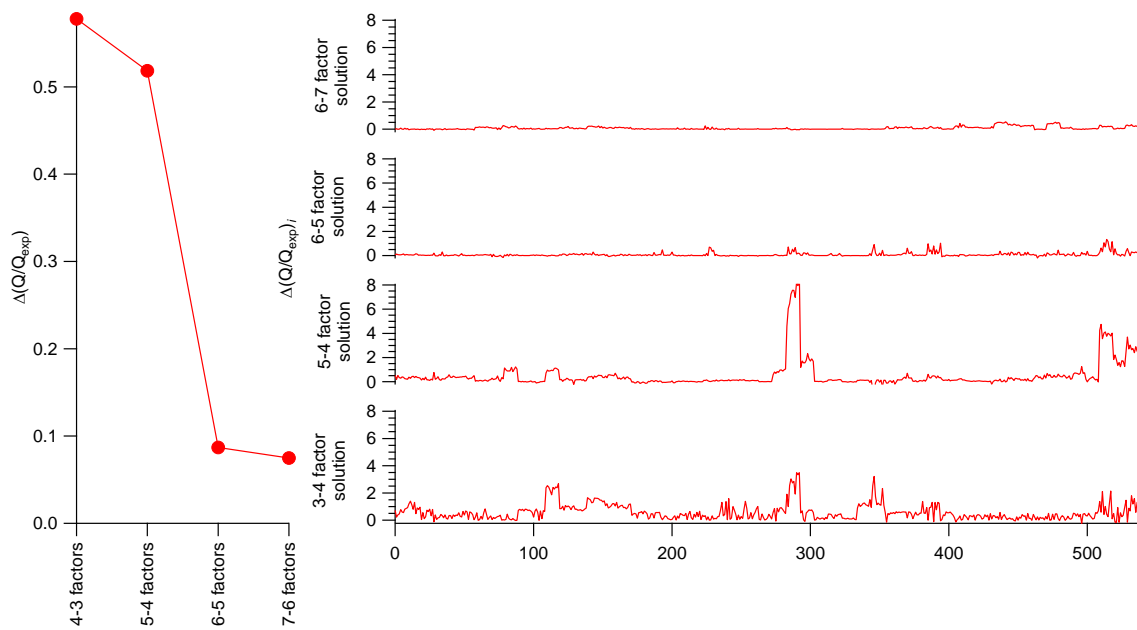

1  
 2 Figure S10. Offline-AMS PMF  $\Delta(Q/Q_{exp})$  analysis. In this study, a large  $Q/Q_{exp}$  decrease  
 3 could be observed up to 5 factors. Increasing the number of factors  $Q/Q_{exp}$  leads to smaller  
 4 increase in the explained variability. The newly separated OOA factors could not be attributed  
 5 to specific aerosol sources/processes.

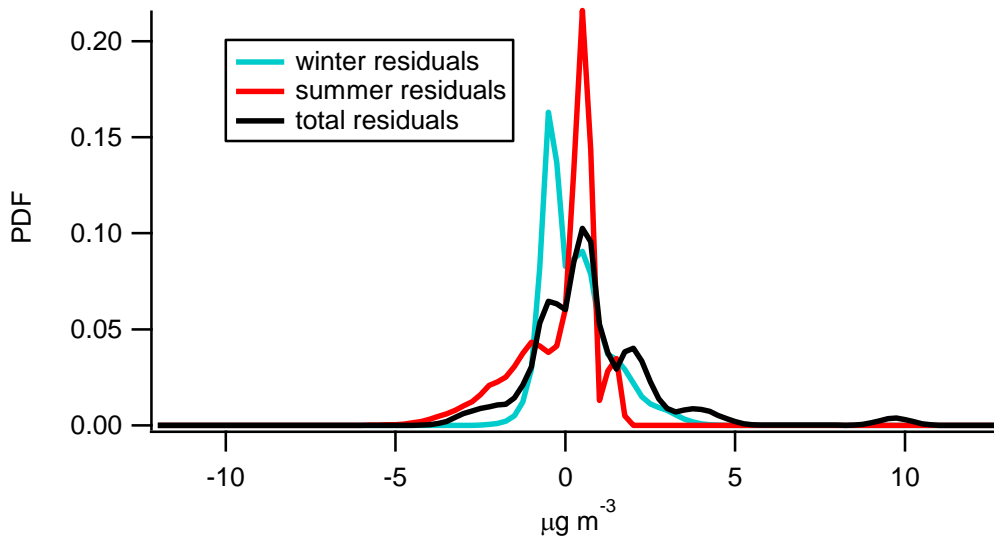

6  
 7 Figure S11. Probability density functions of the OC residuals from  $R_Z$  sensitivity analysis (Eq.  
 8 11).

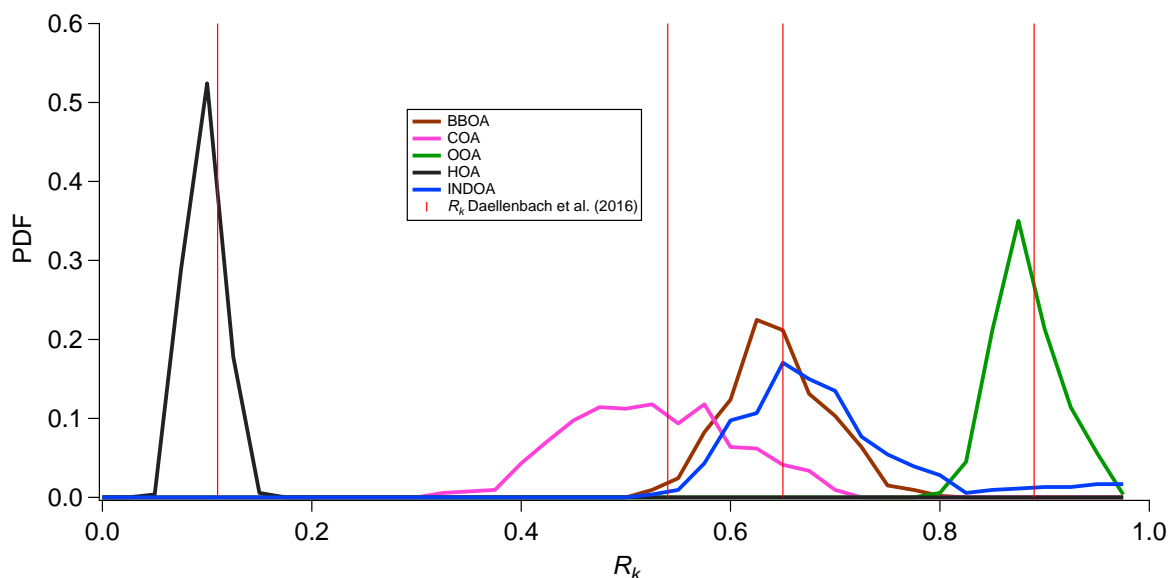

1  
 2 Figure S12. Factor recoveries: probability density functions. Vertical sticks represent the  
 3 recoveries determined by Daellenbach et al. (2016). Estimated recoveries:  $R_{HOA,med} = 0.11$  (1<sup>st</sup>  
 4 quartile 0.10, 3<sup>rd</sup> quartile 0.12);  $R_{BBOA,med} = 0.65$  (1<sup>st</sup> quartile 0.63, 3<sup>rd</sup> quartile 0.69);  $R_{COA,med} =$   
 5  $0.53$  (1<sup>st</sup> quartile 0.48, 3<sup>rd</sup> quartile 0.59);  $R_{OOA,med} = 0.89$  (1<sup>st</sup> quartile 0.87, 3<sup>rd</sup> quartile 0.91).

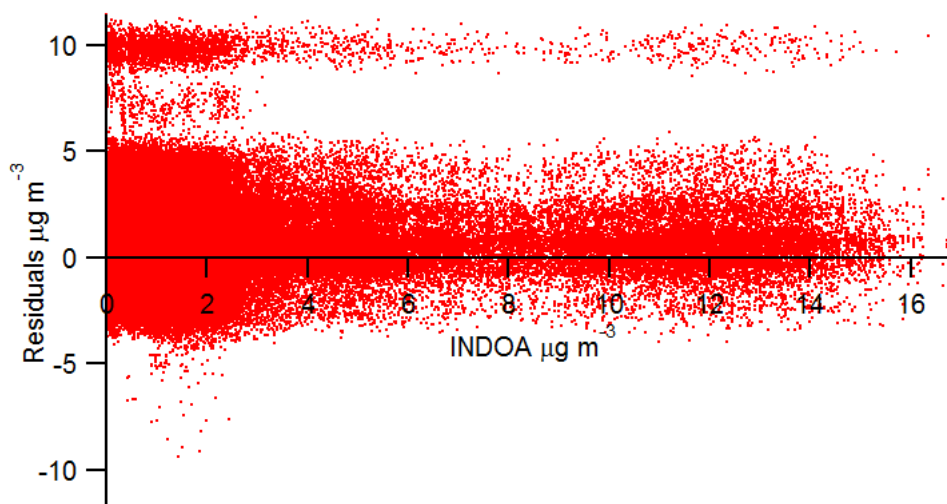

6  
 7 Figure S13. Offline-AMS: INDOA vs residuals concentrations (calculated according to Eq. 8)  
 8 scatter plot. Residuals  $> 6 \mu\text{g m}^{-3}$  represented  $< 2\%$  of the points and were associated to 25  
 9 November, where the C bulk extraction efficiency (Bulk EE = WSOC:OC) was estimated at  
 10  $22\%$ , representing an outlier in comparison to the median Bulk EE =  $0.61$  (1<sup>st</sup> quartile =  $0.54$ ;  
 11 3<sup>rd</sup> quartile =  $0.71$ ).

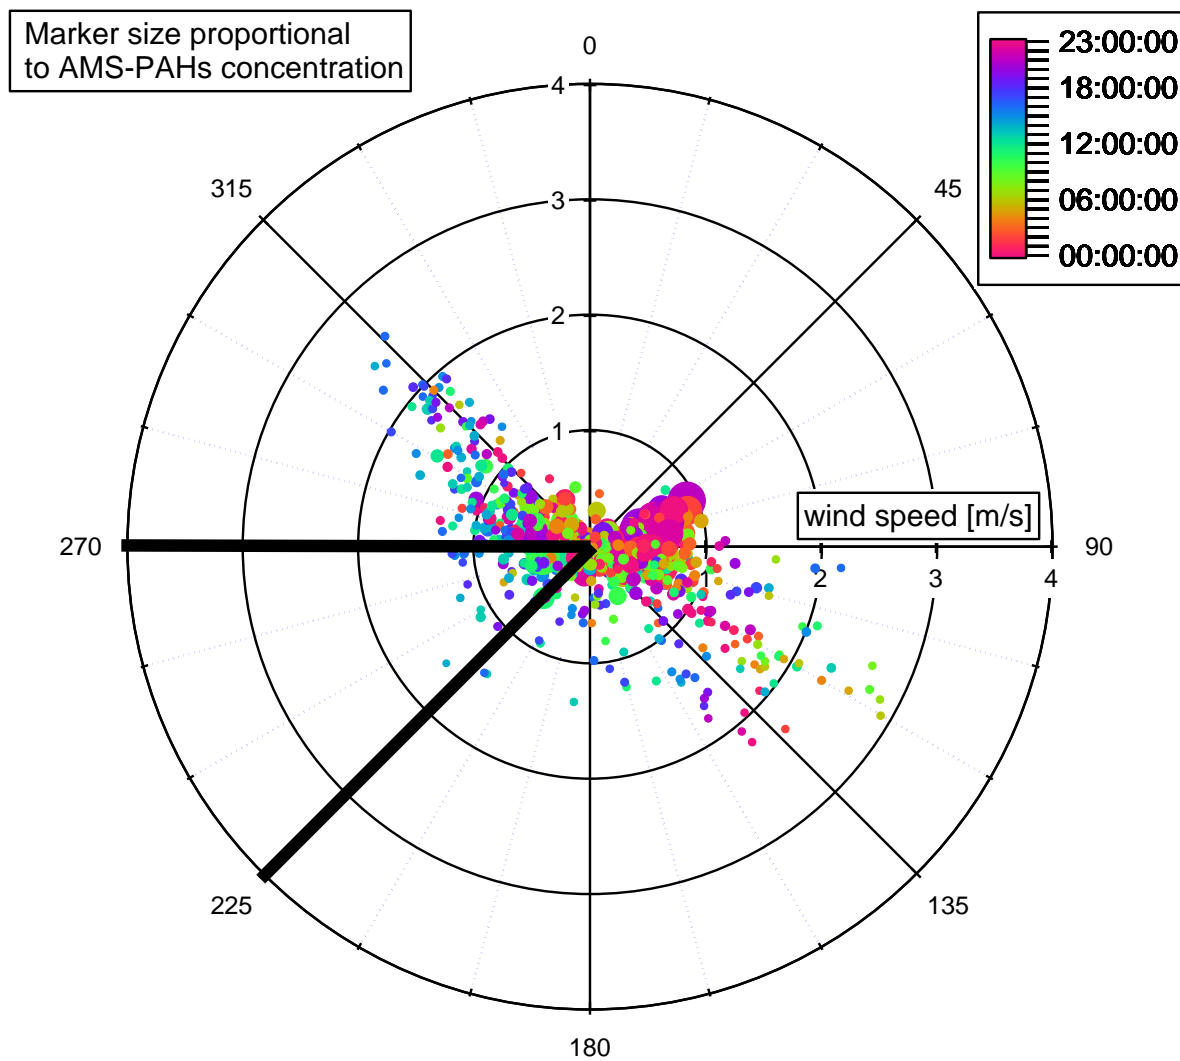

1  
 2 Figure S14. Online-AMS: AMS-PAHs rose plot. Color code denotes the hour of the day;  
 3 marker size is proportional to the AMS-PAHs concentration. The distance from the center is  
 4 proportional to the wind speed. El Haddad et al. (2013) revealed industrial-related emissions  
 5 associated to wind direction from W/SW (225°-270°).

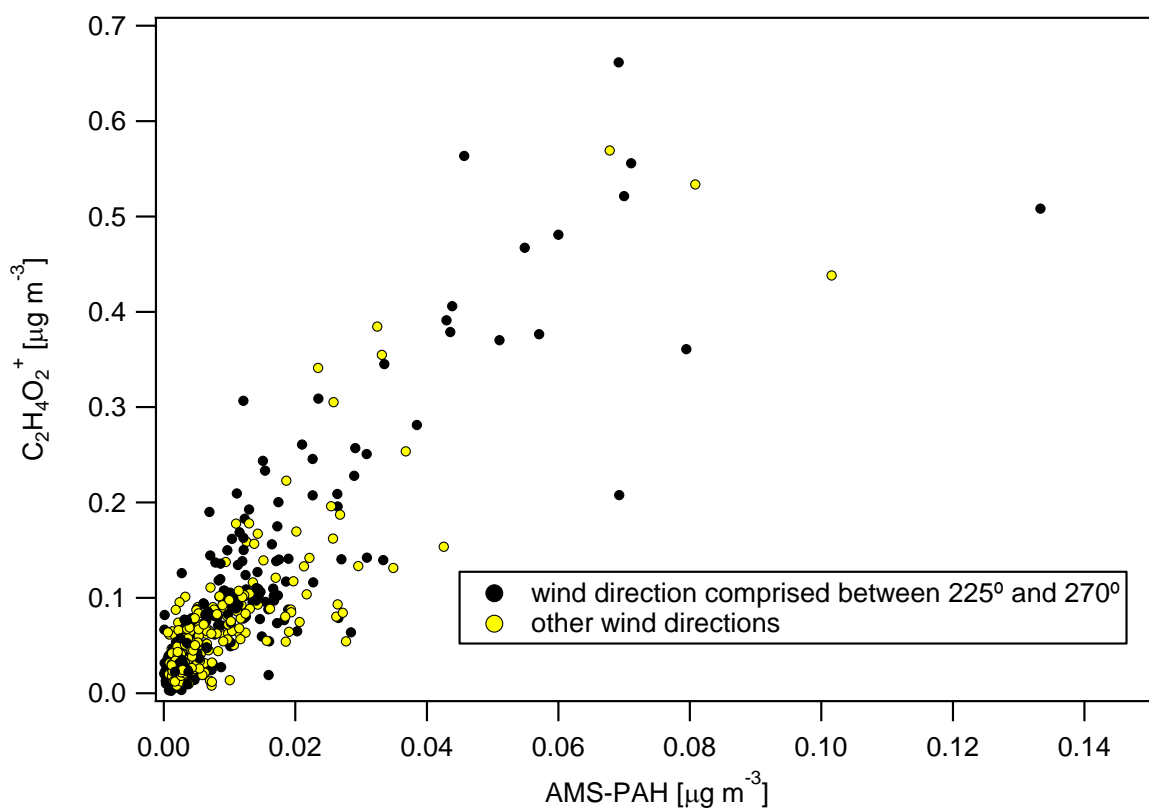

1

2 Figure S15. C<sub>2</sub>H<sub>4</sub>O<sub>2</sub><sup>+</sup> vs AMS-PAHs scatter plot.

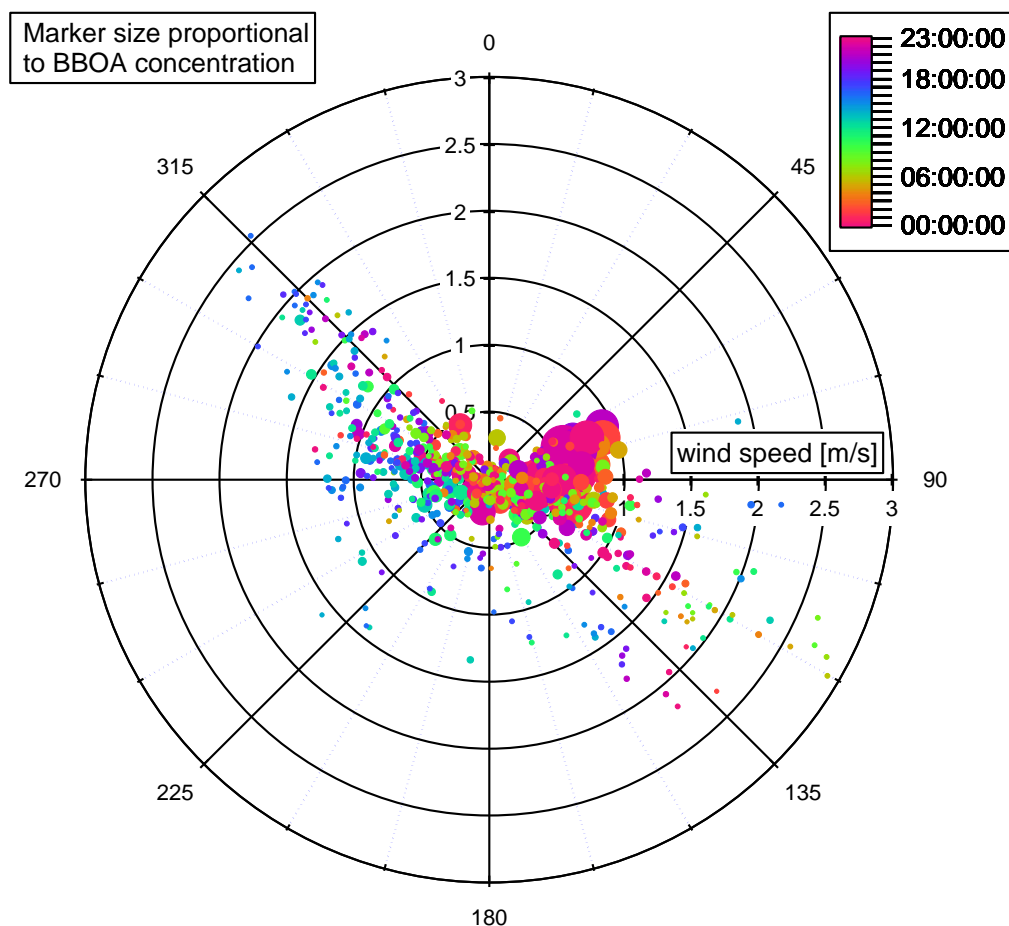

1  
 2 Figure S16. Online-AMS: BBOA rose plot. Color code denotes the hour of the day, marker  
 3 size is proportional to the BBOA concentration. The distance from the center is proportional  
 4 to the wind speed.

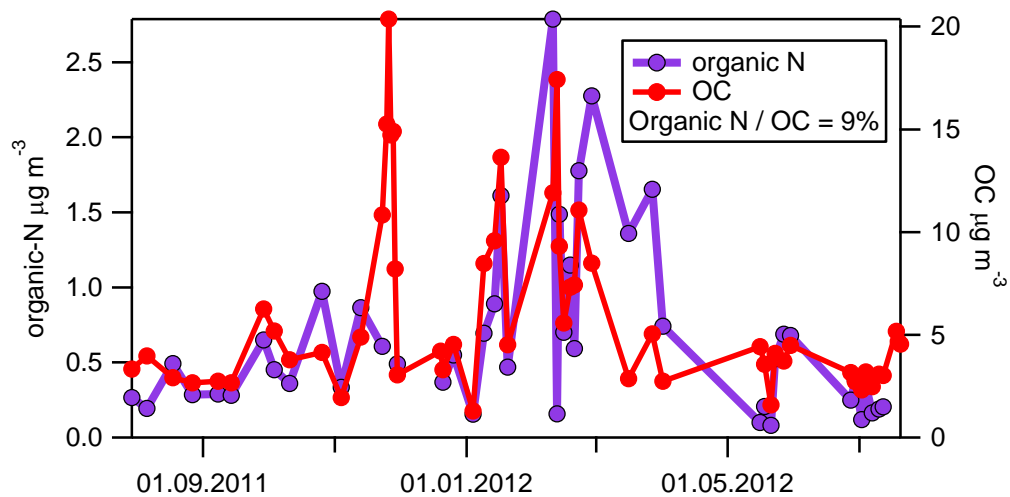

5  
 6 Figure S17. Organic-N and OC time series.

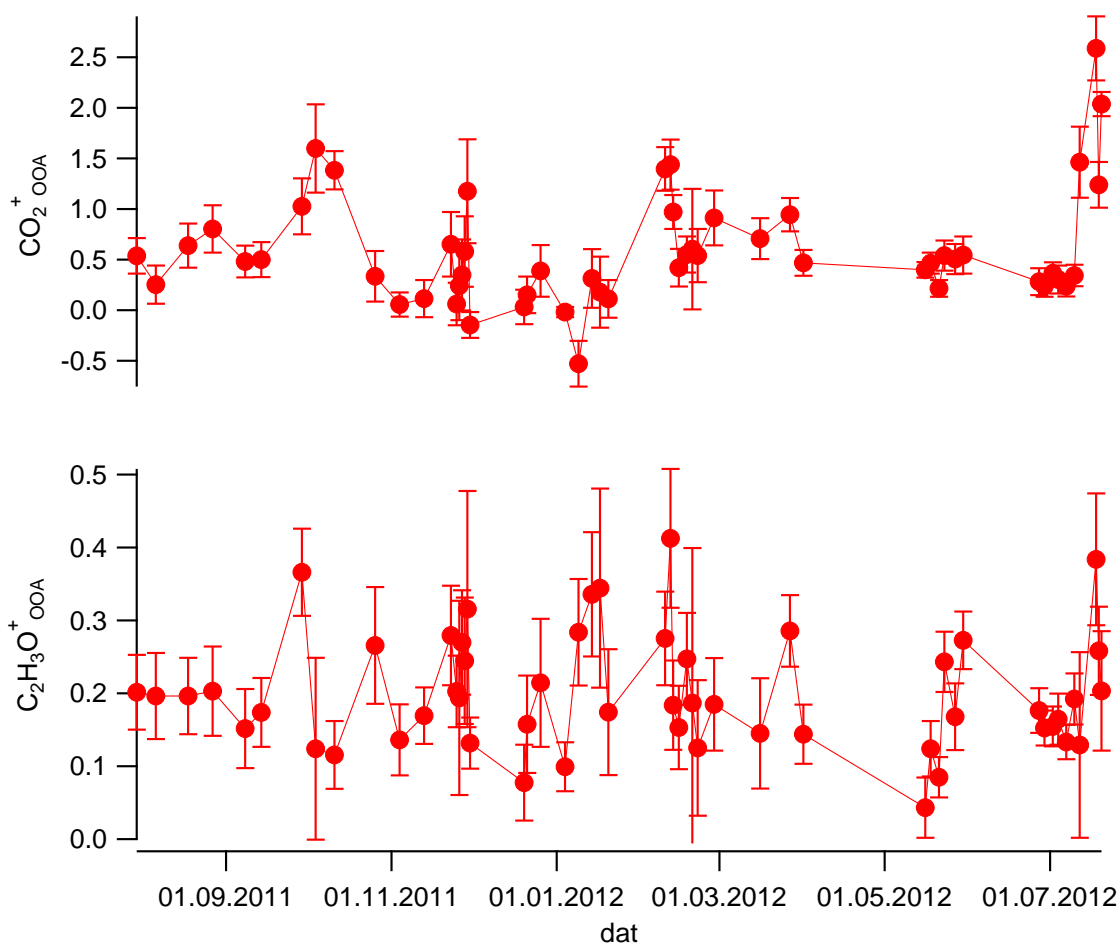

1

2 Figure S18. C<sub>2</sub>H<sub>3</sub>O<sup>+</sup> OOA and CO<sub>2</sub><sup>+</sup> OOA yearly cycle.

3

4 **Comparison of online-AMS and offline-AMS mass spectra.**

5 Offline-AMS source apportionment was conducted on water soluble OA AMS spectra. In this  
 6 section we compare the online- and offline-AMS factor profiles obtained from PMF analysis.  
 7 In general the measured water soluble AMS spectra show a higher O:C ratio (winter median =  
 8 0.51) than online-AMS spectra (median = 0.44). This is also indirectly confirmed by the high  
 9 factor recoveries for the factors characterized by high O:C ratios (e.g. OOA and BBOA),  
 10 while lower recoveries were estimated for the factors associated to low O:C ratios (e.g. COA  
 11 and HOA, Fig. S13), indicating that offline-AMS accesses the most oxidized (i.e. water-  
 12 soluble) OA fraction, consistent with Daellenbach et al., 2016. Table S4 reports the cosine  
 13 similarities between the offline-AMS PMF factor profiles and the average reference online-  
 14 AMS profiles (Crippa et al., 2013b; Mohr et al., 2012; 2009, Bruns et al., 2015; Docherty et  
 15 al., 2011; Setyan et al., 2012; He et al., 2010).

16

1 Table S4. Cosine similarity between offline-AMS PMF factors and average online-AMS  
 2 reference profiles (Crippa et al., 2013b; Mohr et al., 2012; 2009; Bruns et al., 2015; Docherty  
 3 et al., 2011; Setyan et al., 2012; He et al., 2010). The threshold cosine similarity indicates the  
 4 minimum cosine similarity value which defines a mass spectrum as not statistically different  
 5 from the average online-AMS reference profiles. Values highlighted in red indicate offline-  
 6 AMS factor profiles not statistically different from online-AMS reference spectra. Cosine  
 7 similarities were calculated for all the retained offline-AMS PMF spectra. The values reported  
 8 in the table represent the average cosine similarity; the corresponding uncertainty is reported  
 9 in parenthesis.

| Threshold cosine similarity |                                      |      | Offline-AMS factor profiles |           |          |
|-----------------------------|--------------------------------------|------|-----------------------------|-----------|----------|
|                             |                                      |      | HOA                         | COA       | BBOA     |
| 0.957                       | Online-AMS average reference spectra | HOA  | 0.87 (1)                    | 0.87 (1)  | 0.32 (1) |
| 0.91                        |                                      | COA  | 0.931 (3)                   | 0.933 (9) | 0.46 (2) |
| 0.89                        |                                      | BBOA | 0.479 (7)                   | 0.48 (1)  | 0.87 (2) |

10  
 11 As expected from the relatively high recovery (median 0.65), the water soluble fraction of  
 12 BBOA shows a mass spectral fingerprint not statistically different from the BBOA online-  
 13 AMS reference spectra, although more oxidized (O:C = 0.54 for offline-AMS, and 0.35 for  
 14 online-AMS). Despite the different degree of oxidation, the two spectra were not considered  
 15 as different within our uncertainty due to the large variability of the BBOA AMS spectra  
 16 reported in literature. As already mentioned, this variability mostly derives from the different  
 17 burning conditions and fuels. In the same way also COA offline-AMS fingerprint is not  
 18 statistically different from the online-AMS COA spectra. By contrast HOA, that has the  
 19 lowest recoveries among the separated offline-AMS factors, shows a fingerprint which is  
 20 statistically different than the HOA online-AMS reference spectrum, moreover the offline-  
 21 AMS HOA fingerprint is statistically not different from the COA online-AMS reference  
 22 spectrum. This is due to the higher HOA *a*-values associated with the accepted solutions (0.5,  
 23 0.9, 1) in comparison to the COA *a*-values (0.2, 0.3, 0.4, 0.8), which therefore enabled a  
 24 significant variation of the mass spectrum. The resemblance of HOA and COA water-soluble  
 25 spectra is due to the lower water solubility of saturated hydrocarbons in comparison to  
 26 unsaturated hydrocarbons (Daellenbach et al. 2016). While online-AMS HOA literature  
 27 spectra are characterized by similar values of saturated and unsaturated hydrocarbon  
 28 fragments, the online-AMS COA reference spectra show higher values for saturated



1 hydrocarbon fragments in comparison to unsaturated ones (Mohr et al., 2009). The lower  
2 water solubility of saturated hydrocarbons therefore leads to similar COA and HOA  
3 fragmentation fingerprints for the water soluble spectra.
